# Supplementary material for: Hydrodeoxygenation of Pyrolysis Oil in Supercritical Ethanol with Formic Acid as an In Situ Hydrogen Source over NiMoW Catalysts Supported on Different Materials
Source: MDPI journal article supplement (doi:10.3390/su15107768), 2023-05-09
Supplement: s1 [file s1]

# Hydrodeoxygenation of Pyrolysis Oil in Supercritical Ethanol with Formic Acid as an In Situ Hydrogen Source over NiMoW Catalysts Supported on Different Materials

Mingyuan Zhang <sup>1,†</sup>, Xue Han <sup>2,†</sup>, Huanang Wang <sup>1</sup>, Yimin Zeng <sup>2,\*</sup> and Chunbao Charles Xu <sup>1,\*</sup>

<sup>1</sup> Department of Chemical and Biochemical Engineering, Western University, London, ON N6A 3K7, Canada; mzhan582@uwo.ca (M.Z.); hwan482@uwo.ca (H.W.)

<sup>2</sup> CanmetMATERIALS, Natural Resources Canada, Hamilton, ON L8P 0A5, Canada; xue.han@nrcan-rncan.gc.ca

\* Correspondence: yimin.zeng@nrcan-rncan.gc.ca (Y.Z.); cxu6@uwo.ca (C.C.X.)

† These authors contribute equally to this work.

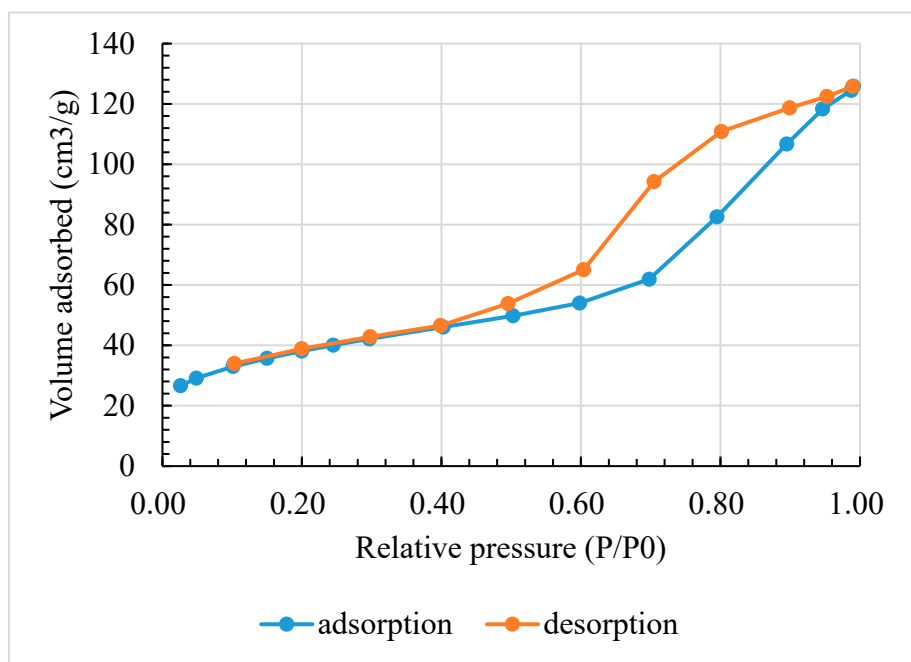

(a)

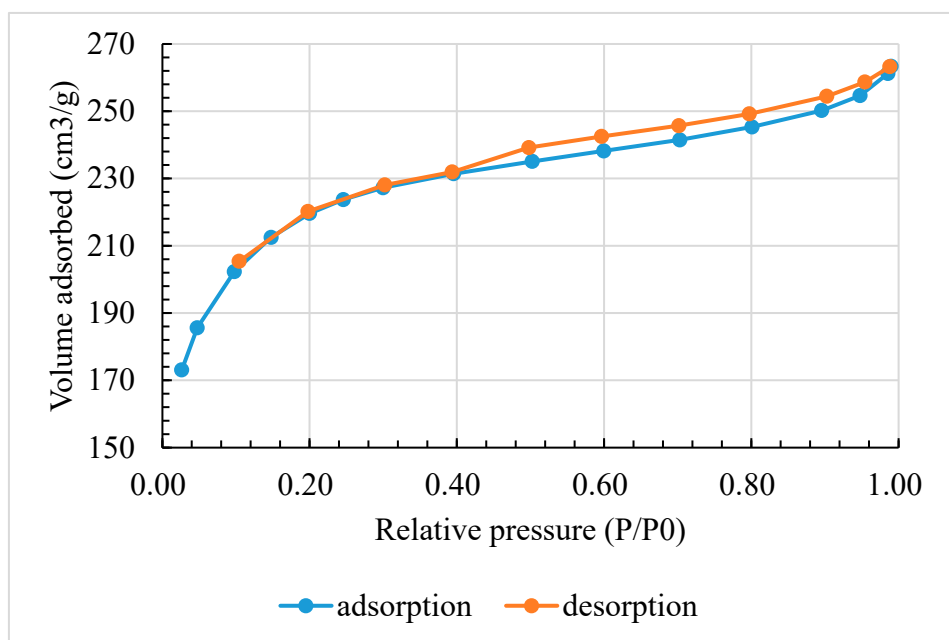

(b)

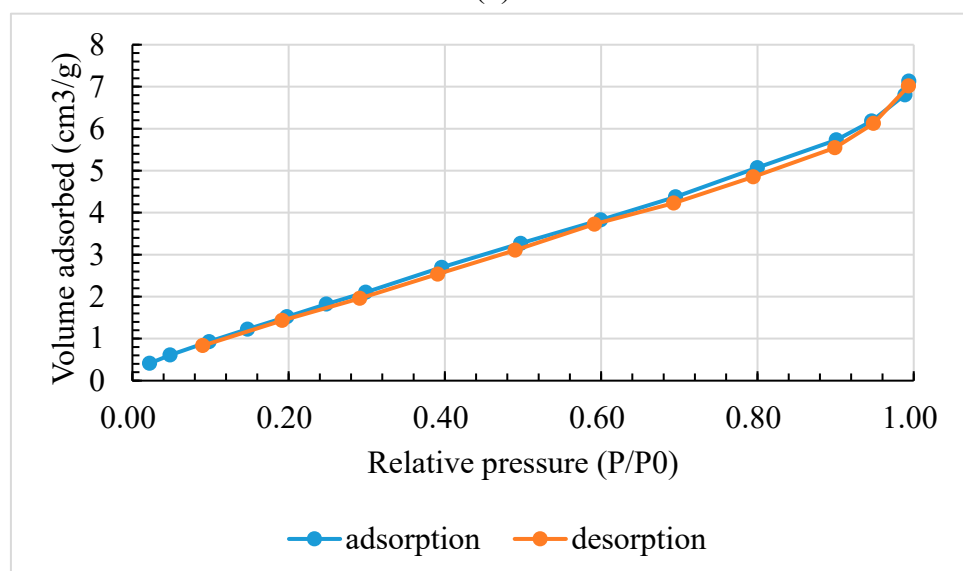

(c)

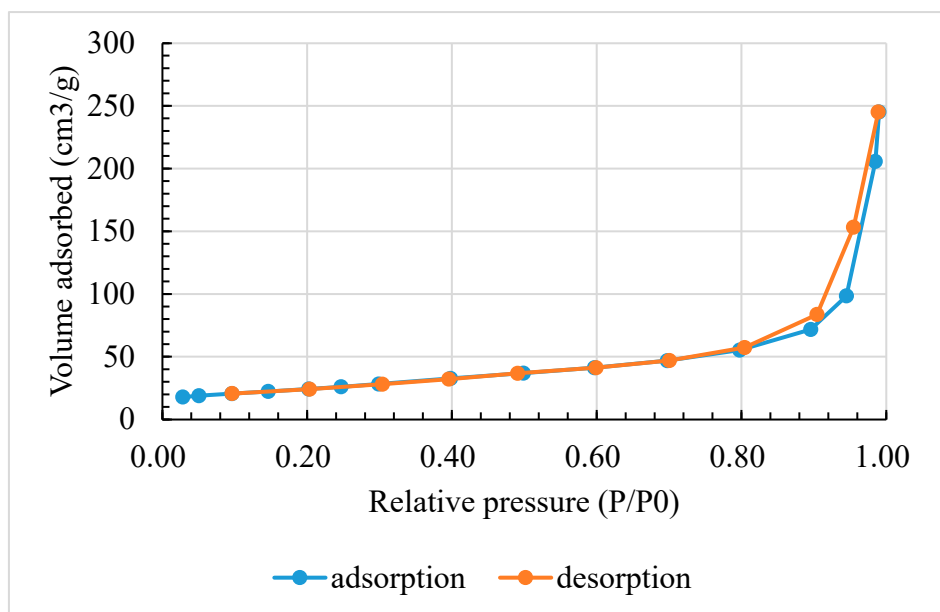

(d)

**Figure S1.** Nitrogen adsorption/desorption isotherms of (a) NiMoW/Al<sub>2</sub>O<sub>3</sub>, (b) NiMoW/AC, (c) NiMoW/SC, (d) NiMoW/MWNTs

**Table S1.** Organic composition of crude pyrolysis oil

| Compounds                                              | Crude pyrolysis oil |
|--------------------------------------------------------|---------------------|
| <b>Acids</b>                                           | <b>14.01</b>        |
| Acetic acid                                            | 6.45                |
| 3-(3,4,5-Trimethoxyphenyl)propionic acid               | 3.49                |
| Dehydroabietic acid                                    | 4.07                |
| <b>Aldehyde</b>                                        | <b>1.23</b>         |
| 3,5-Heptadienal, 2-ethylidene-6-methyl-                | 1.23                |
| <b>Phenolics</b>                                       | <b>62.59</b>        |
| Phenol, 2-methoxy-                                     | 8.25                |
| Creosol                                                | 20.42               |
| Phenol, 4-ethyl-2-methoxy-                             | 7.40                |
| Phenol, 2-methoxy-5-(1-propenyl)-, (E)-                | 6.73                |
| Resorcinol                                             | 1.54                |
| 3-Allyl-6-methoxyphenol                                | 6.23                |
| Phenol, 2-methoxy-4-propyl-                            | 5.28                |
| trans-Isoeugenol                                       | 6.73                |
| <b>Ketones</b>                                         | <b>8.34</b>         |
| 2-Cyclopenten-1-one, 2-hydroxy-3-methyl-               | 3.46                |
| 2(3H)-Naphthalenone, 4,4a,5,6,7,8-hexahydro-1-methoxy- | 1.37                |
| Hydrocortisone                                         | 1.49                |
| 3,8,11,12,14-Pentahydroxypregn-5-en-20-one             | 2.02                |
| <b>Easters</b>                                         | <b>0.00</b>         |

|                                     |             |
|-------------------------------------|-------------|
| <b>Aromatics</b>                    | <b>0.00</b> |
| <b>Hydrocarbons</b>                 | <b>0.00</b> |
| <b>Alcohols</b>                     | <b>2.00</b> |
| Olean-12-ene-3,15,16,21,22,28-hexol | 2.00        |

**Table S2.** Organic composition of upgraded oil obtained over NiMoW/Al<sub>2</sub>O<sub>3</sub> at 300°C with in-situ hydrogen source

| Compounds                                                       | NiMoW/Al <sub>2</sub> O <sub>3</sub> -300°C-in situ |
|-----------------------------------------------------------------|-----------------------------------------------------|
| <b>Acids</b>                                                    | <b>0.00</b>                                         |
| <b>Aldehyde</b>                                                 | <b>0.00</b>                                         |
| <b>Phenolics</b>                                                | <b>45.58</b>                                        |
| Phenol, 2-methoxy-                                              | 5.72                                                |
| Phenol, 2,5-dimethyl-                                           | 1.20                                                |
| Creosol                                                         | 17.19                                               |
| 1,4-Benzenediol, 2,3,5-trimethyl-                               | 2.45                                                |
| Phenol, 4-ethyl-2-methoxy-                                      | 7.50                                                |
| Phenol, 2-methoxy-4-propyl-                                     | 5.84                                                |
| Phenol, 2-methoxy-4-propyl-                                     | 5.68                                                |
| <b>Ketones</b>                                                  | <b>12.20</b>                                        |
| Ethanone, 1-(1-cyclohexen-1-yl)-                                | 1.70                                                |
| 5H-Inden-5-one, 1,2,3,6,7,7a-hexahydro-7a-methyl-               | 2.33                                                |
| Spiro[4.5]dec-6-en-8-one, 1,7-dimethyl-4-(1-methylethyl)-       | 1.65                                                |
| 2(3H)-Naphthalenone, 4,4a,5,6,7,8-hexahydro-1-methoxy-          | 2.57                                                |
| 2-(1-Cyclohexenyl)cyclohexanone                                 | 1.51                                                |
| 2(1H)-Naphthalenone, 1-(dimethoxymethyl)-3,4,5,6,7,8-hexahydro- | 1.40                                                |
| 4-(3-Hydroxy-2,6,6-trimethylcyclohex-1-enyl)pent-3-en-2-one     | 1.05                                                |
| <b>Esters</b>                                                   | <b>6.49</b>                                         |
| Hexadecanoic acid, ethyl ester                                  | 1.05                                                |
| Methyl abietate                                                 | 1.31                                                |
| Ethyl Oleate                                                    | 1.15                                                |
| Methyl dehydroabietate                                          | 2.99                                                |
| <b>Aromatics</b>                                                | <b>16.23</b>                                        |
| Naphthalene, 1,2,3,4-tetrahydro-                                | 10.55                                               |
| 1-Methyl-10,18-bisnorabieta-8,11,13-triene                      | 1.54                                                |
| Methyl dehydroabietate                                          | 2.99                                                |
| <b>Hydrocarbons</b>                                             | <b>0.00</b>                                         |
| <b>Alcohols</b>                                                 | <b>0.00</b>                                         |

**Table S3.** Organic composition of upgraded oil obtained over NiMoW/AC at 300°C with in-situ hydrogen source

| Compounds                                                   | NiMoW/AC-300°C-in situ |
|-------------------------------------------------------------|------------------------|
| <b>Acids</b>                                                | <b>0.00</b>            |
| <b>Aldehyde</b>                                             | <b>0.00</b>            |
| <b>Phenolics</b>                                            | <b>71.82</b>           |
| Phenol                                                      | 1.10                   |
| Phenol, 2-methyl-                                           | 1.08                   |
| p-Cresol                                                    | 2.59                   |
| Phenol, 2-methoxy-                                          | 4.39                   |
| Phenol, 2-ethyl-                                            | 1.51                   |
| Phenol, 2,3-dimethyl-                                       | 3.38                   |
| Phenol, 2,5-dimethyl-                                       | 2.53                   |
| 2-Methoxy-6-methylphenol                                    | 1.19                   |
| Phenol, 3-ethyl-5-methyl-                                   | 1.23                   |
| Creosol                                                     | 6.12                   |
| Phenol, 2-ethyl-5-methyl-                                   | 2.85                   |
| Phenol, 2-ethyl-4-methyl-                                   | 2.18                   |
| Phenol, 4-ethyl-2-methyl-                                   | 3.31                   |
| Phenol, 2,3,5-trimethyl-                                    | 0.89                   |
| Phenol, 4-ethyl-2-methoxy-                                  | 5.47                   |
| Phenol, 2-ethyl-4,5-dimethyl-                               | 1.36                   |
| 2,5-Diethylphenol                                           | 2.46                   |
| Thymol                                                      | 1.59                   |
| Phenol, 2,3,5,6-tetramethyl-                                | 1.52                   |
| Phenol, 3-methoxy-2,4,5-trimethyl-                          | 3.65                   |
| Phenol, 2-methoxy-4-propyl-                                 | 4.66                   |
| 2-Ethyl-5-n-propylphenol                                    | 2.26                   |
| Benzenemethanol, 4-(1,1-dimethylethyl)-                     | 1.95                   |
| 1,4-Benzenediol, 2,3,5-trimethyl-                           | 4.84                   |
| Phenol, 4-(3-hydroxy-1-propenyl)-2-methoxy-                 | 1.87                   |
| Durohydroquinone                                            | 1.41                   |
| 3,7-Benzofurandiol, 2,3-dihydro-2,2-dimethyl-               | 1.04                   |
| Phenol, 3-methoxy-2,5,6-trimethyl-                          | 3.40                   |
| <b>Ketones</b>                                              | <b>9.31</b>            |
| 2-Cyclopenten-1-one, 2,3-dimethyl-                          | 0.97                   |
| Ethanone, 1-(1-cyclohexen-1-yl)-                            | 1.09                   |
| Cyclohexene, 1,5,5-trimethyl-6-acetylmethyl                 | 2.38                   |
| 5-Acetyl-4,6,6-trimethylcyclohexa-2,4-dienone               | 1.38                   |
| 4-(3-Hydroxy-2,6,6-trimethylcyclohex-1-enyl)pent-3-en-2-one | 1.15                   |
| 2,5-di-tert-Butyl-1,4-benzoquinone                          | 2.33                   |
| <b>Esters</b>                                               | <b>1.93</b>            |
| Diethyl methylsuccinate                                     | 1.93                   |

|                                            |             |
|--------------------------------------------|-------------|
| <b>Aromatics</b>                           | <b>3.98</b> |
| 1-Methyl-10,18-bisnorabieta-8,11,13-triene | 1.46        |
| Retene                                     | 2.52        |
| <b>Hydrocarbons</b>                        | <b>0.00</b> |
| <b>Alcohols</b>                            | <b>0.00</b> |

**Table S4.** Organic composition of upgraded oil obtained over NiMoW/SC at 300°C with in-situ hydrogen source

| Compounds                                                 | NiMoW/SC-300°C-in situ |
|-----------------------------------------------------------|------------------------|
| <b>Acids</b>                                              | <b>0.00</b>            |
| <b>Aldehyde</b>                                           | <b>0.00</b>            |
| <b>Phenolics</b>                                          | <b>71.13</b>           |
| Phenol                                                    | 0.91                   |
| Phenol, 2-methyl-                                         | 1.21                   |
| p-Cresol                                                  | 2.80                   |
| Phenol, 2-methoxy-                                        | 4.45                   |
| Phenol, 2-ethyl-                                          | 1.23                   |
| Phenol, 2,4-dimethyl-                                     | 3.50                   |
| Phenol, 3-ethyl-                                          | 2.78                   |
| Phenol, 3,5-dimethyl-                                     | 2.21                   |
| Creosol                                                   | 6.40                   |
| Phenol, 2-ethyl-5-methyl-                                 | 2.57                   |
| Phenol, 3-ethyl-5-methyl-                                 | 2.39                   |
| Phenol, 2-ethyl-4-methyl-                                 | 2.75                   |
| Phenol, 2,3,5-trimethyl-                                  | 1.01                   |
| Phenol, 2,4,6-trimethyl-                                  | 1.00                   |
| Phenol, 4-ethyl-2-methoxy-                                | 6.11                   |
| 2,5-Diethylphenol                                         | 2.62                   |
| Phenol, 2-methyl-5-(1-methylethyl)-                       | 1.59                   |
| Phenol, 2,3,5,6-tetramethyl-                              | 1.10                   |
| Phenol, 3-methoxy-2,5,6-trimethyl-                        | 2.69                   |
| Phenol, 2-methoxy-4-propyl-                               | 4.84                   |
| 4-Ethylcatechol                                           | 2.60                   |
| Phenol, 4-(1,1-dimethylpropyl)-                           | 1.19                   |
| 1,4-Benzenediol, 2,3,5-trimethyl-                         | 5.33                   |
| Phenol, 4-(3-hydroxy-1-propenyl)-2-methoxy-               | 2.46                   |
| Durohydroquinone                                          | 1.26                   |
| 3,7-Benzofurandiol, 2,3-dihydro-2,2-dimethyl-             | 1.15                   |
| Phenol, 3-methoxy-2,5,6-trimethyl-                        | 2.98                   |
| <b>Ketones</b>                                            | <b>8.90</b>            |
| 2-Cyclopenten-1-one, 2,3-dimethyl-                        | 1.01                   |
| Cyclohexanone, 2-(2-butyryl)-                             | 1.44                   |
| 2,5,5,8a-Tetramethyl-6,7,8,8a-tetrahydro-5H-chromen-3-one | 1.69                   |

|                                                                            |             |
|----------------------------------------------------------------------------|-------------|
| 1H-2-Indenone,2,4,5,6,7,7a-hexahydro-3-(1-methylethyl)-7a-methyl           | 2.32        |
| 5-Hydroxy-8,8-dimethyl-3,3a,4,5,6,7,8,8b-octahydroindeno[1,2-b]furan-2-one | 1.09        |
| 5H-Benzo[b]pyran-8-ol, 2,3,5,5,8a-pentamethyl-6,7,8,8a-tetrahydro-         | 1.42        |
| <b>Esters</b>                                                              | <b>5.48</b> |
| Pentanoic acid, 4-oxo-, ethyl ester                                        | 1.16        |
| Diethyl methylsuccinate                                                    | 1.69        |
| 1-Cyclohexene-1-acrylic acid, 2,6,6-trimethyl-3-oxo-, methyl ester         | 2.62        |
| <b>Aromatics</b>                                                           | <b>3.81</b> |
| 1-Methyl-10,18-bisnorabieta-8,11,13-triene                                 | 1.21        |
| Retene                                                                     | 2.60        |
| <b>Hydrocarbons</b>                                                        | <b>1.10</b> |
| 1,3-Cyclohexadiene, 1,2,3,4,5,6-hexamethyl-                                | 1.10        |
| <b>Alcohols</b>                                                            | <b>0.00</b> |

**Table S5.** Organic composition of upgraded oil obtained over NiMoW/MWNTs at 300°C with in-situ hydrogen source

| Compounds                                    | NiMoW/MWNTs-300°C-in situ |
|----------------------------------------------|---------------------------|
| <b>Acids</b>                                 | <b>0.00</b>               |
| <b>Aldehyde</b>                              | <b>0.00</b>               |
| <b>Phenolics</b>                             | <b>68.10</b>              |
| Phenol                                       | 0.75                      |
| Phenol, 3-methyl-                            | 0.94                      |
| p-Cresol                                     | 2.02                      |
| Phenol, 2-methoxy-                           | 3.63                      |
| Phenol, 2-ethyl-                             | 1.28                      |
| Phenol, 3,5-dimethyl-                        | 3.55                      |
| Phenol, 3-ethyl-                             | 2.37                      |
| Phenol, 3-methoxy-2-methyl-                  | 2.10                      |
| Creosol                                      | 5.55                      |
| Phenol, 2-ethyl-5-methyl-                    | 2.59                      |
| Phenol, 3-ethyl-5-methyl-                    | 2.39                      |
| Phenol, 2-ethyl-4-methyl-                    | 3.01                      |
| Phenol, 4-ethyl-2-methoxy-                   | 5.48                      |
| 2,5-Diethylphenol                            | 2.33                      |
| Phenol, 2,3,5,6-tetramethyl-                 | 2.46                      |
| Phenol, 4-(1-methylethyl)-                   | 4.33                      |
| Phenol, 3-methoxy-2,4,5-trimethyl-           | 1.69                      |
| Phenol, 2-methoxy-4-propyl-                  | 4.18                      |
| 1,2-Benzenediol, 3,5-bis(1,1-dimethylethyl)- | 3.36                      |
| 1,4-Benzenediol, 2,3,5-trimethyl-            | 2.89                      |

|                                                                    |              |
|--------------------------------------------------------------------|--------------|
| Phenol, 3-(1,1-dimethylethyl)-4-methoxy-                           | 2.68         |
| Phenol, 4-(3-hydroxy-1-propenyl)-2-methoxy-                        | 1.28         |
| Phenol, 5-methoxy-2,3,4-trimethyl-                                 | 4.31         |
| Phenol, 3-(1,1-dimethylethyl)-4-methoxy-                           | 1.27         |
| Phenol, 3-ethyl-                                                   | 1.68         |
| <b>Ketones</b>                                                     | <b>13.78</b> |
| 2-Cyclopenten-1-one, 2,3-dimethyl-                                 | 1.09         |
| 2-Cyclopenten-1-one, 3,4,4-trimethyl-                              | 1.03         |
| 2-Butanone, 4-(2,6,6-trimethyl-1-cyclohexen-1-yl)-                 | 1.60         |
| 2(3H)-Naphthalenone, 4,4a,5,6,7,8-hexahydro-1-methoxy-             | 1.81         |
| 2,5,5,8a-Tetramethyl-6,7,8,8a-tetrahydro-5H-chromen-3-one          | 1.60         |
| Cyclohexene, 1,5,5-trimethyl-6-acetylmethyl-                       | 2.09         |
| 4-Hydroxy-?-ionone                                                 | 1.39         |
| 2,5,5,8a-Tetramethyl-6,7,8,8a-tetrahydro-5H-chromen-3-one          | 1.15         |
| 4-(3-Hydroxy-2,6,6-trimethylcyclohex-1-enyl)pent-3-en-2-one        | 2.03         |
| <b>Esters</b>                                                      | <b>6.65</b>  |
| Butanedioic acid, methyl-, dimethyl ester                          | 1.73         |
| 1-Cyclohexene-1-acrylic acid, 2,6,6-trimethyl-3-oxo-, methyl ester | 2.93         |
| 5,8,11,14-Eicosatetraynoic acid, methyl ester                      | 1.99         |
| <b>Aromatics</b>                                                   | <b>5.04</b>  |
| 1-Methyl-10,18-bisnorabieta-8,11,13-triene                         | 1.77         |
| 4b,8-Dimethyl-2-isopropylphenanthrene,                             | 1.14         |
| 4b,5,6,7,8,8a,9,10-octahydro-                                      |              |
| Retene                                                             | 2.13         |
| <b>Hydrocarbons</b>                                                | <b>0.00</b>  |
| <b>Alcohols</b>                                                    | <b>0.00</b>  |

**Table S6.** Organic composition of upgraded oil obtained over NiMoW/Al<sub>2</sub>O<sub>3</sub> at 350°C with in-situ hydrogen source

| Compounds             | NiMoW/Al <sub>2</sub> O <sub>3</sub> -350°C-in situ |
|-----------------------|-----------------------------------------------------|
| <b>Acids</b>          | <b>0.00</b>                                         |
| <b>Aldehyde</b>       | <b>0.00</b>                                         |
| <b>Phenolics</b>      | <b>66.02</b>                                        |
| Phenol                | 1.41                                                |
| Phenol, 2-methyl-     | 1.96                                                |
| Phenol, 3-methyl-     | 2.65                                                |
| Phenol, 2-methoxy-    | 2.27                                                |
| Phenol, 2-ethyl-      | 1.29                                                |
| Phenol, 3,5-dimethyl- | 3.49                                                |
| Phenol, 3-ethyl-      | 3.07                                                |



|                                                                               |              |
|-------------------------------------------------------------------------------|--------------|
| Phenol, 2-ethyl-5-methyl-                                                     | 2.11         |
| Creosol                                                                       | 3.10         |
| Phenol, 2,4,6-trimethyl-                                                      | 1.18         |
| Phenol, 2-ethyl-5-methyl-                                                     | 3.44         |
| Phenol, 3-ethyl-5-methyl-                                                     | 2.92         |
| Phenol, 3-(1-methylethyl)-                                                    | 3.66         |
| Phenol, 2,4,6-trimethyl-                                                      | 0.64         |
| Phenol, 2,3,5,6-tetramethyl-                                                  | 4.79         |
| Thymol                                                                        | 4.55         |
| Phenol, 2-methyl-5-(1-methylethyl)-                                           | 2.20         |
| 2,5-Diethylphenol                                                             | 3.48         |
| 2-Ethyl-5-n-propylphenol                                                      | 2.35         |
| Phenol, 2-methoxy-4-propyl-                                                   | 3.24         |
| Phenol, 2-(1,1-dimethylethyl)-5-methyl-                                       | 3.36         |
| Phenol, 2,5-bis(1-methylethyl)-                                               | 3.03         |
| 6-tert-Butyl-2,4-dimethylphenol                                               | 1.96         |
| Propofol                                                                      | 1.42         |
| Phenol, 2-(1-methyl-2-buthenyl)-4-methoxy-                                    | 1.45         |
| Phenol, 3,5-bis(1,1-dimethylethyl)-                                           | 0.99         |
| <b>Ketones</b>                                                                | <b>17.42</b> |
| 2-Cyclopenten-1-one, 2,3,4-trimethyl-                                         | 0.52         |
| 2-Cyclohexen-1-one, 3,4-dimethyl-                                             | 0.46         |
| 2-Cyclopenten-1-one, 2,3-dimethyl-                                            | 1.00         |
| 2,5,5,8a-Tetramethyl-3,5,6,7,8,8a-hexahydro-2H-naphthalen-1-one               | 1.51         |
| 2H-Inden-2-one, 1,4,5,6,7,7a-hexahydro-7a-methyl-, (S)-                       | 1.46         |
| 1H-2-Indenone,2,4,5,6,7,7a-hexahydro-3-(1-methylethyl)-7a-methyl              | 2.65         |
| 5-Acetyl-4,6,6-trimethylcyclohexa-2,4-dienone                                 | 3.42         |
| 4-(2-Methyl-cyclohex-1-enyl)-but-3-en-2-one                                   | 3.09         |
| 2-Buten-1-one, 1-(2,6,6-trimethyl-1-cyclohexen-1-yl)-                         | 1.37         |
| 2,5-di-tert-Butyl-1,4-benzoquinone                                            | 1.05         |
| 3-Ethyl-4,4-dimethyl-2-(2-methylpropenyl)cyclohex-2-enone                     | 0.89         |
| <b>Esters</b>                                                                 | <b>3.74</b>  |
| 1-Cyclohexene-1-acrylic acid, 2,6,6-trimethyl-3-oxo-, methyl ester            | 1.55         |
| 5,8,11,14-Eicosatetraynoic acid, methyl ester                                 | 0.96         |
| Acetic acid, 5-(2,2-dimethyl-6-oxocyclohexylidene)-3-methyl-pent-3-enyl ester | 1.23         |
| <b>Aromatics</b>                                                              | <b>2.81</b>  |
| 1-Methyl-10,18-bisnorabieta-8,11,13-triene                                    | 1.09         |
| Retene                                                                        | 1.72         |
| <b>Hydrocarbons</b>                                                           | <b>1.64</b>  |
| 1H-Indene, 1-ethylideneoctahydro-7a-methyl-, cis-                             | 1.64         |

|                 |             |
|-----------------|-------------|
| <b>Alcohols</b> | <b>0.00</b> |
|-----------------|-------------|

**Table S7.** Organic composition of upgraded oil obtained over NiMoW/AC at 350°C with in-situ hydrogen source

| Compounds                                                       | NiMoW/AC-350°C-in situ |
|-----------------------------------------------------------------|------------------------|
| <b>Acids</b>                                                    | <b>0.00</b>            |
| <b>Aldehyde</b>                                                 | <b>0.00</b>            |
| <b>Phenolics</b>                                                | <b>75.88</b>           |
| Phenol                                                          | 0.99                   |
| Phenol, 2-methyl-                                               | 1.27                   |
| p-Cresol                                                        | 2.85                   |
| Phenol, 2,6-dimethyl-                                           | 0.45                   |
| 2-Cyclohexen-1-one, 4-ethyl-4-methyl-                           | 1.08                   |
| Phenol, 2-ethyl-                                                | 1.98                   |
| Phenol, 3,5-dimethyl-                                           | 3.29                   |
| Phenol, 3-ethyl-                                                | 3.56                   |
| Phenol, 2,3-dimethyl-                                           | 0.60                   |
| Phenol, 3-ethyl-5-methyl-                                       | 0.95                   |
| Phenol, 3,4-dimethyl-                                           | 1.61                   |
| Phenol, 2-ethyl-5-methyl-                                       | 4.37                   |
| Phenol, 3-ethyl-5-methyl-                                       | 3.32                   |
| Phenol, 2-ethyl-6-methyl-                                       | 4.58                   |
| Phenol, 2,3,6-trimethyl-                                        | 1.34                   |
| Phenol, 2-ethyl-6-methyl-                                       | 3.25                   |
| 1,4-Benzenediol, 2,5-dimethyl-                                  | 1.18                   |
| Thymol                                                          | 3.16                   |
| 2,5-Diethylphenol                                               | 4.88                   |
| Phenol, 2-ethyl-4,5-dimethyl-                                   | 1.39                   |
| Phenol, 3,5-diethyl-                                            | 4.53                   |
| Phenol, 2,3,5,6-tetramethyl-                                    | 3.99                   |
| Phenol, 2-(1,1-dimethylethyl)-5-methyl-                         | 1.33                   |
| 2-Ethyl-5-n-propylphenol                                        | 1.16                   |
| Phenol, 2-(1,1-dimethylethyl)-5-methyl-                         | 4.29                   |
| Phenol, 3,5-bis(1-methylethyl)-                                 | 7.48                   |
| Propofol                                                        | 3.42                   |
| 6-tert-Butyl-2,4-dimethylphenol                                 | 2.70                   |
| Phenol, 2,5-bis(1-methylethyl)-                                 | 0.88                   |
| <b>Ketones</b>                                                  | <b>11.24</b>           |
| 2-Cyclopenten-1-one, 3,4,4-trimethyl-                           | 0.54                   |
| 1-Cyclohexene-1-carboxaldehyde, 2,6,6-trimethyl-                | 0.92                   |
| 4-(2-Methyl-cyclohex-1-enyl)-but-3-en-2-one                     | 1.35                   |
| 2,5,5,8a-Tetramethyl-3,5,6,7,8,8a-hexahydro-2H-naphthalen-1-one | 1.11                   |

|                                                                                      |             |
|--------------------------------------------------------------------------------------|-------------|
| 2-Cyclohexen-1-one, 4-hydroxy-3,5,5-trimethyl-4-(3-methyl-1,3-butadienyl)-, [S-(E)]- | 1.17        |
| 2,5-di-tert-Butyl-1,4-benzoquinone                                                   | 1.29        |
| 3-Buten-2-one, 4-(2,6,6-trimethyl-1-cyclohexen-1-yl)-                                | 1.41        |
| 2,5-Cyclohexadiene-1,4-dione, 2,6-bis(1,1-dimethylethyl)-                            | 1.01        |
| 2,3-Dehydro-4-oxo-?-ionol                                                            | 1.51        |
| 3-Ethyl-4,4-dimethyl-2-(2-methylpropenyl)cyclohex-2-enone                            | 0.94        |
| <b>Esters</b>                                                                        | <b>0.00</b> |
| <b>Aromatics</b>                                                                     | <b>2.28</b> |
| Retene                                                                               | 2.28        |
| <b>Hydrocarbons</b>                                                                  | <b>0.88</b> |
| 1H-Indene, 1-ethylideneoctahydro-7a-methyl-, cis-                                    | 0.88        |
| <b>Alcohols</b>                                                                      | <b>0.00</b> |

**Table S8.** Organic composition of upgraded oil obtained over NiMoW/SC at 350°C with in-situ hydrogen source

| Compounds                               | NiMoW/SC-350°C-in situ |
|-----------------------------------------|------------------------|
| <b>Acids</b>                            | <b>0.00</b>            |
| <b>Aldehyde</b>                         | <b>0.00</b>            |
| <b>Phenolics</b>                        | <b>66.64</b>           |
| Phenol                                  | 1.43                   |
| Phenol, 2-methyl-                       | 2.08                   |
| p-Cresol                                | 4.07                   |
| Phenol, 2-methoxy-                      | 2.18                   |
| Phenol, 2,5-dimethyl-                   | 1.26                   |
| Phenol, 2-ethyl-                        | 1.61                   |
| Phenol, 3,5-dimethyl-                   | 4.04                   |
| Phenol, 3-ethyl-                        | 4.71                   |
| Phenol, 2-ethyl-4-methyl-               | 2.13                   |
| Creosol                                 | 3.37                   |
| Phenol, 2,4,6-trimethyl-                | 1.24                   |
| Phenol, 2-ethyl-5-methyl-               | 4.10                   |
| Phenol, 3-ethyl-5-methyl-               | 3.28                   |
| Phenol, 2-ethyl-4-methyl-               | 4.72                   |
| Phenol, 2,3,5-trimethyl-                | 6.23                   |
| 2,5-Diethylphenol                       | 3.74                   |
| 3-Methyl-4-isopropylphenol              | 1.45                   |
| Phenol, 4-(1-methylpropyl)-             | 1.98                   |
| Phenol, 2,3,5,6-tetramethyl-            | 3.45                   |
| Phenol, 2-methoxy-4-propyl-             | 6.10                   |
| Phenol, 4-(1,1-dimethylpropyl)-         | 1.42                   |
| Phenol, 2-(1,1-dimethylethyl)-4-methyl- | 2.04                   |
| <b>Ketones</b>                          | <b>9.74</b>            |
| 2-Cyclopenten-1-one, 2,3-dimethyl-      | 0.78                   |

|                                                                      |              |
|----------------------------------------------------------------------|--------------|
| 2,5,5,8a-Tetramethyl-3,5,6,7,8,8a-hexahydro-2H-naphthalen-1-one      | 1.15         |
| 1-Butyn-3-one, 1-(6,6-dimethyl-1,2-epoxycyclohexyl)-                 | 2.27         |
| 5-Acetyl-4,6,6-trimethylcyclohexa-2,4-dienone                        | 3.74         |
| 2,5-di-tert-Butyl-1,4-benzoquinone                                   | 1.80         |
| <b>Esters</b>                                                        | <b>4.81</b>  |
| 1-Cyclohexene-1-acrylic acid, 2,6,6-trimethyl-3-oxo-, methyl ester   | 2.01         |
| Octadecanoic acid, ethyl ester                                       | 1.43         |
| Hexadecanoic acid, ethyl ester                                       | 0.74         |
| Hexadecanoic acid, ethyl ester                                       | 0.64         |
| <b>Aromatics</b>                                                     | <b>10.03</b> |
| 4b,8-Dimethyl-2-isopropylphenanthrene, 4b,5,6,7,8,8a,9,10-octahydro- | 2.26         |
| 4b,8-Dimethyl-2-isopropylphenanthrene, 4b,5,6,7,8,8a,9,10-octahydro- | 0.90         |
| Phenanthrene, 2,7-dimethyl-                                          | 0.92         |
| 9-Ethyl-10-methylantracene                                           | 2.35         |
| Retene                                                               | 3.59         |
| <b>Hydrocarbons</b>                                                  | <b>0.00</b>  |
| <b>Alcohols</b>                                                      | <b>0.00</b>  |

**Table S9.** Organic composition of upgraded oil obtained over NiMoW/MWNTs at 350°C with in-situ hydrogen source

| Compounds                      | NiMoW/MWNTs-350°C-in situ |
|--------------------------------|---------------------------|
| <b>Acids</b>                   | <b>0.00</b>               |
| <b>Aldehyde</b>                | <b>0.00</b>               |
| <b>Phenolics</b>               | <b>74.01</b>              |
| Phenol                         | 1.08                      |
| Phenol, 2-methyl-              | 1.45                      |
| p-Cresol                       | 3.09                      |
| Phenol, 2-ethyl-               | 2.04                      |
| Phenol, 3,5-dimethyl-          | 3.27                      |
| Phenol, 3-ethyl-               | 3.65                      |
| Phenol, 2,3-dimethyl-          | 0.58                      |
| Phenol, 3-ethyl-5-methyl-      | 0.93                      |
| Phenol, 3,4-dimethyl-          | 1.60                      |
| Phenol, 2-ethyl-5-methyl-      | 4.28                      |
| Phenol, 3-ethyl-5-methyl       | 3.38                      |
| Phenol, 2-ethyl-4-methyl-      | 4.79                      |
| Phenol, 2,4,6-trimethyl-       | 1.32                      |
| Phenol, 3,5-diethyl-           | 2.50                      |
| 1,4-Benzenediol, 2,5-dimethyl- | 1.22                      |
| 2,5-Diethylphenol              | 4.25                      |

|                                                                  |              |
|------------------------------------------------------------------|--------------|
| Phenol, 2-methyl-5-(1-methylethyl)-                              | 3.97         |
| Phenol, 2-ethyl-4,5-dimethyl-                                    | 1.47         |
| Phenol, 3,5-diethyl-                                             | 4.74         |
| Phenol, 2,3,5,6-tetramethyl-                                     | 4.01         |
| Phenol, 2-(1,1-dimethylethyl)-5-methyl-                          | 2.51         |
| Phenol, 2-(1,1-dimethylethyl)-3-methyl-                          | 4.27         |
| Phenol, 3,5-bis(1-methylethyl)-                                  | 5.95         |
| Propofol                                                         | 3.49         |
| Phenol, 2,4-bis(1-methylethyl)-                                  | 2.81         |
| 2,5-di-tert-Butyl-1,4-benzoquinone                               | 1.37         |
| <b>Ketones</b>                                                   | <b>11.70</b> |
| 2-Cyclopenten-1-one, 2,3,4-trimethyl-                            | 0.65         |
| 2-Cyclohexen-1-one, 3,4-dimethyl-                                | 0.62         |
| 2-Cyclopenten-1-one, 2,3-dimethyl-                               | 0.73         |
| 2-Cyclohexen-1-one, 4-ethyl-4-methyl-                            | 1.17         |
| 2-(2-Methyl-propenyl)-cyclohexanone                              | 0.86         |
| 4-(2-Methyl-cyclohex-1-enyl)-but-3-en-2-one                      | 1.34         |
| 2,5,5,8a-Tetramethyl-3,5,6,7,8,8a-hexahydro-2H-naphthalen-1-one  | 1.03         |
| 3-Buten-2-one, 4-(2,6,6-trimethyl-1-cyclohexen-1-yl)-            | 1.51         |
| 1H-2-Indenone,2,4,5,6,7,7a-hexahydro-3-(1-methylethyl)-7a-methyl | 1.10         |
| 2,3-Dehydro-4-oxo-?-ionol                                        | 1.66         |
| 3-Ethyl-4,4-dimethyl-2-(2-methylpropenyl)cyclohex-2-enone        | 1.03         |
| <b>Easters</b>                                                   | <b>2.88</b>  |
| Carbonic acid, ethyl 4-methoxyphenyl ester                       | 0.89         |
| 5,8,11,14-Eicosatetraynoic acid, methyl ester                    | 0.96         |
| Methyl abietate                                                  | 1.03         |
| <b>Aromatics</b>                                                 | <b>3.76</b>  |
| Carbonic acid, ethyl 4-methoxyphenyl ester                       | 0.89         |
| 5,8,11,14-Eicosatetraynoic acid, methyl ester                    | 0.96         |
| Methyl abietate                                                  | 1.03         |
| <b>Hydrocarbons</b>                                              | <b>0.00</b>  |
| <b>Alcohols</b>                                                  | <b>0.00</b>  |

**Table S10.** Organic composition of upgraded oil obtained over NiMoW/Al<sub>2</sub>O<sub>3</sub> at 350°C with ex-situ hydrogen source

| Compounds         | NiMoW/Al <sub>2</sub> O <sub>3</sub> -350°C-ex situ |
|-------------------|-----------------------------------------------------|
| <b>Acids</b>      | <b>0.00</b>                                         |
| <b>Aldehyde</b>   | <b>0.00</b>                                         |
| <b>Phenolics</b>  | <b>63.08</b>                                        |
| Phenol            | 1.05                                                |
| Phenol, 2-methyl- | 1.31                                                |

|                                                                      |              |
|----------------------------------------------------------------------|--------------|
| p-Cresol                                                             | 3.54         |
| Phenol, 2-methoxy-                                                   | 2.44         |
| Phenol, 2,6-dimethyl-                                                | 0.82         |
| Phenol, 2-ethyl-                                                     | 1.40         |
| Phenol, 2,5-dimethyl-                                                | 3.22         |
| Phenol, 3-ethyl-                                                     | 3.48         |
| Phenol, 2,3-dimethyl-                                                | 2.24         |
| Creosol                                                              | 4.14         |
| Phenol, 2-ethyl-5-methyl-                                            | 3.22         |
| Phenol, 3-ethyl-5-methyl-                                            | 2.77         |
| Phenol, 2-ethyl-4-methyl-                                            | 3.85         |
| Phenol, 2,4,5-trimethyl-                                             | 1.05         |
| Phenol, 4-ethyl-2-methoxy-                                           | 5.40         |
| 2,5-Diethylphenol                                                    | 2.60         |
| Phenol, 2-methyl-5-(1-methylethyl)-                                  | 2.86         |
| Phenol, 2,3,5,6-tetramethyl-                                         | 1.26         |
| Phenol, 3,5-diethyl-                                                 | 4.35         |
| Phenol, 2-methoxy-4-propyl-                                          | 3.10         |
| Phenol, 2-(1,1-dimethylethyl)-5-methyl-                              | 3.27         |
| Propofol                                                             | 2.13         |
| Phenol, 2,5-bis(1-methylethyl)-                                      | 2.42         |
| Phenol, 3-methoxy-2,5,6-trimethyl-                                   | 1.16         |
| <b>Ketones</b>                                                       | <b>20.49</b> |
| 2-Cyclopenten-1-one, 2,3-dimethyl-                                   | 2.63         |
| 4-(2-Methyl-cyclohex-1-enyl)-but-3-en-2-one                          | 3.67         |
| 2,5,5,8a-Tetramethyl-6,7,8,8a-tetrahydro-5H-chromen-3-one            | 2.38         |
| 4-(2-Acetyl-5,5-dimethylcyclopent-2-enylidene)butan-2-one            | 2.93         |
| 1H-2-Indenone,2,4,5,6,7,7a-hexahydro-3-(1-methylethyl)-7a-methyl     | 1.73         |
| 2,5-di-tert-Butyl-1,4-benzoquinone                                   | 1.55         |
| 2-Buten-1-one, 1-(2,6,6-trimethyl-1-cyclohexen-1-yl)-                | 1.81         |
| 2,5-di-tert-Butyl-1,4-benzoquinone                                   | 1.21         |
| 3-Ethyl-4,4-dimethyl-2-(2-methylpropenyl)cyclohex-2-enone            | 1.06         |
| 2-Butanone, 4-(2,6,6-trimethyl-1-cyclohexen-1-yl)-                   | 1.51         |
| <b>Esters</b>                                                        | <b>2.68</b>  |
| Diethyl methylsuccinate                                              | 1.49         |
| 1-Cyclohexene-1-acrylic acid, 2,6,6-trimethyl-3-oxo-, methyl ester   | 1.19         |
| <b>Aromatics</b>                                                     | <b>5.84</b>  |
| 4b,8-Dimethyl-2-isopropylphenanthrene, 4b,5,6,7,8,8a,9,10-octahydro- | 1.27         |
| 1-Methyl-10,18-bisnorabieta-8,11,13-triene                           | 0.83         |
| Retene                                                               | 1.74         |
| Naphthalene, 2-methyl-                                               | 2.00         |

|                                                          |             |
|----------------------------------------------------------|-------------|
| <b>Hydrocarbons</b>                                      | <b>2.28</b> |
| 1,3-Cyclohexadiene, 1,2,3,4,5,6-hexamethyl-              | 2.28        |
| <b>Alcohols</b>                                          | <b>2.51</b> |
| 2-Methyl-4-(2,6,6-trimethylcyclohex-1-enyl)but-2-en-1-ol | 1.44        |
| 1-Naphthalenol, 1,2,3,4-tetrahydro-2,5,8-trimethyl-      | 1.07        |

**Table S11.** Organic composition of upgraded oil obtained over NiMoW/AC at 350°C with ex-situ hydrogen source

| Compounds                                     | NiMoW/AC-350°C-ex situ |
|-----------------------------------------------|------------------------|
| <b>Acids</b>                                  | <b>0.00</b>            |
| <b>Aldehyde</b>                               | <b>0.00</b>            |
| <b>Phenolics</b>                              | <b>72.26</b>           |
| Phenol                                        | 1.90                   |
| Phenol, 2-methyl-                             | 1.48                   |
| p-Cresol                                      | 5.64                   |
| Phenol, 2-methoxy-                            | 2.06                   |
| Phenol, 2,6-dimethyl-                         | 1.08                   |
| Phenol, 2-ethyl-                              | 2.08                   |
| Phenol, 2,4-dimethyl-                         | 3.14                   |
| Phenol, 3-ethyl-                              | 5.46                   |
| Phenol, 2,3-dimethyl-                         | 2.55                   |
| Creosol                                       | 4.15                   |
| Phenol, 2,4,6-trimethyl-                      | 1.71                   |
| Phenol, 2-ethyl-5-methyl-                     | 3.69                   |
| Phenol, 3-ethyl-5-methyl-                     | 3.01                   |
| Phenol, 2-ethyl-4-methyl-                     | 5.60                   |
| Phenol, 2,3,5-trimethyl-                      | 0.97                   |
| Phenol, 2,4,6-trimethyl-                      | 0.93                   |
| 3,4-Diethylphenol                             | 2.65                   |
| Thymol                                        | 3.41                   |
| Phenol, 2,3,5,6-tetramethyl-                  | 1.22                   |
| Phenol, 3,5-diethyl-                          | 4.40                   |
| Phenol, 2-methoxy-4-propyl-                   | 5.90                   |
| 1,3-Benzenediol, 4-ethyl-                     | 2.15                   |
| 2-Ethyl-5-n-propylphenol                      | 2.07                   |
| Phenol, 2-(1,1-dimethylethyl)-5-methyl-       | 2.26                   |
| Propofol                                      | 1.12                   |
| Phenol, 2,5-bis(1-methylethyl)-               | 1.65                   |
| <b>Ketones</b>                                | <b>4.45</b>            |
| 5-Acetyl-4,6,6-trimethylcyclohexa-2,4-dienone | 4.45                   |
| <b>Easters</b>                                | <b>2.62</b>            |
| Benzene, 1-methoxy-4-(1-methylpropyl)-        | 1.84                   |

|                                                                                                                                                     |             |
|-----------------------------------------------------------------------------------------------------------------------------------------------------|-------------|
| 1-Phenanthrenecarboxylic acid, 7-ethenyl-<br>1,2,3,4,4a,4b,5,6,7,9,10,10a-dodecahydro-1,4a,7-trimethyl-,<br>ethyl ester, [1R-(1?,4a?,4b?,7?,10a?)]- | 0.79        |
| <b>Aromatics</b>                                                                                                                                    | <b>4.20</b> |
| Naphthalene, 2-methyl-                                                                                                                              | 1.49        |
| 1-Methyl-10,18-bisnorabieta-8,11,13-triene                                                                                                          | 1.03        |
| Retene                                                                                                                                              | 1.69        |
| <b>Hydrocarbons</b>                                                                                                                                 | <b>1.42</b> |
| 1H-Indene, 1-ethylideneoctahydro-7a-methyl-, cis-                                                                                                   | 1.42        |
| <b>Alcohols</b>                                                                                                                                     | <b>5.51</b> |
| O-Methoxy-methylbenzyl alcohol                                                                                                                      | 4.36        |
| 5H-Benzo[b]pyran-8-ol, 2,3,5,5,8a-pentamethyl-6,7,8,8a-<br>tetrahydro-                                                                              | 1.15        |

**Table S12.** Organic composition of upgraded oil obtained over NiMoW/SC at 350°C with ex-situ hydrogen source

| Compounds                           | NiMoW/SC-350°C-ex situ |
|-------------------------------------|------------------------|
| <b>Acids</b>                        | <b>0.00</b>            |
| <b>Aldehyde</b>                     | <b>0.00</b>            |
| <b>Phenolics</b>                    | <b>74.34</b>           |
| Phenol                              | 2.25                   |
| Phenol, 2-methyl-                   | 1.55                   |
| p-Cresol                            | 6.47                   |
| Phenol, 2-methoxy-                  | 2.21                   |
| Phenol, 2,6-dimethyl-               | 0.91                   |
| Phenol, 2-ethyl-                    | 2.05                   |
| Phenol, 2,5-dimethyl-               | 3.96                   |
| Phenol, 3-ethyl-                    | 6.02                   |
| Phenol, 2,3-dimethyl-               | 2.39                   |
| Creosol                             | 3.62                   |
| Phenol, 2,3,5-trimethyl-            | 1.49                   |
| Phenol, 2-ethyl-5-methyl-           | 3.34                   |
| Phenol, 4-ethyl-3-methyl-           | 3.05                   |
| Phenol, 3-propyl-                   | 6.04                   |
| Phenol, 2,4,5-trimethyl-            | 1.01                   |
| Phenol, 2,4,6-trimethyl-            | 0.94                   |
| Phenol, 2-ethyl-6-methyl-           | 3.80                   |
| 2,5-Diethylphenol                   | 2.40                   |
| Thymol                              | 3.06                   |
| Phenol, 2,3,5,6-tetramethyl-        | 1.10                   |
| Phenol, 3,5-diethyl-                | 4.04                   |
| Phenol, 2-methyl-5-(1-methylethyl)- | 3.03                   |
| Phenol, 2-methoxy-4-propyl-         | 1.97                   |
| 2-Ethyl-5-n-propylphenol            | 1.80                   |



|                                                                      |             |
|----------------------------------------------------------------------|-------------|
| Phenol, 2-(1,1-dimethylethyl)-5-methyl-                              | 1.24        |
| 2-Ethyl-5-n-propylphenol                                             | 4.62        |
| <b>Ketones</b>                                                       | <b>4.05</b> |
| 2-Cyclopenten-1-one, 2,3-dimethyl-                                   | 1.58        |
| 2,3-Dehydro-4-oxo-?-ionol                                            | 2.47        |
| <b>Esters</b>                                                        | <b>2.16</b> |
| Octadecanoic acid, ethyl ester                                       | 1.20        |
| Hexadecanoic acid, 2-(hexadecyloxy)ethyl ester                       | 0.95        |
| <b>Aromatics</b>                                                     | <b>7.81</b> |
| s-Indacene, 1,2,3,5,6,7-hexahydro-1,1,4,8-tetramethyl-               | 1.12        |
| 4b,8-Dimethyl-2-isopropylphenanthrene, 4b,5,6,7,8,8a,9,10-octahydro- | 2.03        |
| 1-Methyl-10,18-bisnorabieta-8,11,13-triene                           | 1.30        |
| 9-Ethyl-10-methylanthracene                                          | 1.27        |
| Retene                                                               | 2.10        |
| <b>Hydrocarbons</b>                                                  | <b>2.62</b> |
| Bicyclo[4.4.1]undeca-1,3,5,7,9-pentaene                              | 1.32        |
| 1H-Indene, 1-ethylideneoctahydro-7a-methyl-, cis-                    | 1.30        |
| <b>Alcohols</b>                                                      | <b>1.93</b> |
| 2-Methyl-4-(2,6,6-trimethylcyclohex-1-enyl)but-2-en-1-ol             | 1.93        |

**Table S13.** Organic composition of upgraded oil obtained over NiMoW/MWNTs at 350°C with ex-situ hydrogen source

| Compounds                  | NiMoW/MWNTs-350°C-ex situ |
|----------------------------|---------------------------|
| <b>Acids</b>               | <b>0.00</b>               |
| <b>Aldehyde</b>            | <b>0.00</b>               |
| <b>Phenolics</b>           | <b>67.03</b>              |
| Phenol                     | 1.56                      |
| Phenol, 2-methyl-          | 0.92                      |
| p-Cresol                   | 4.38                      |
| Phenol, 2,6-dimethyl-      | 0.66                      |
| Phenol, 2-ethyl-           | 2.63                      |
| Phenol, 2,3-dimethyl-      | 2.17                      |
| Phenol, 3-ethyl-           | 5.21                      |
| Phenol, 2,3-dimethyl-      | 0.69                      |
| Creosol                    | 0.90                      |
| Phenol, 3,4-dimethyl-      | 1.52                      |
| Phenol, 2-ethyl-5-methyl-  | 4.76                      |
| Phenol, 3-ethyl-5-methyl-  | 3.23                      |
| Phenol, 2-ethyl-4-methyl-  | 5.98                      |
| Phenol, 2,4,6-trimethyl-   | 1.32                      |
| Phenol, 3,4,5-trimethyl-   | 2.44                      |
| 2,5-Diethylphenol          | 3.16                      |
| 3-Methyl-4-isopropylphenol | 5.43                      |

|                                                                            |              |
|----------------------------------------------------------------------------|--------------|
| Phenol, 2-ethyl-4,5-dimethyl-                                              | 1.32         |
| Phenol, 3,5-diethyl-                                                       | 5.08         |
| Phenol, 2-methyl-5-(1-methylethyl)-                                        | 4.00         |
| Phenol, 2-(1,1-dimethylethyl)-5-methyl-                                    | 2.43         |
| Propofol                                                                   | 2.52         |
| Phenol, 3,5-bis(1-methylethyl)-                                            | 2.49         |
| Phenol, 2,5-bis(1,1-dimethylethyl)-                                        | 1.01         |
| Phenol, 2-(1-methyl-2-buthenyl)-4-methoxy-                                 | 1.21         |
| <b>Ketones</b>                                                             | <b>21.85</b> |
| 4-Cyclopentene-1,3-dione, 4-propyl-                                        | 3.03         |
| 2,5,5,8a-Tetramethyl-3,5,6,7,8,8a-hexahydro-2H-naphthalen-1-one            | 2.95         |
| 5-Hydroxy-8,8-dimethyl-3,3a,4,5,6,7,8,8b-octahydroindeno[1,2-b]furan-2-one | 4.12         |
| 2,5-di-tert-Butyl-1,4-benzoquinone                                         | 1.32         |
| 2,3-Dehydro-4-oxo-?-ionol                                                  | 3.84         |
| 3-Ethyl-4,4-dimethyl-2-(2-methylpropenyl)cyclohex-2-enone                  | 1.24         |
| 2-Cyclopenten-1-one, 2,3-dimethyl-                                         | 5.35         |
| <b>Easters</b>                                                             | <b>0.97</b>  |
| 8-Acetyl-5,5-dimethyl-nona-2,3,8-trienoic acid, methyl ester               | 0.97         |
| <b>Aromatics</b>                                                           | <b>3.85</b>  |
| 4b,8-Dimethyl-2-isopropylphenanthrene,                                     | 1.15         |
| 4b,5,6,7,8,8a,9,10-octahydro-                                              |              |
| 1-Methyl-10,18-bisnorabieta-8,11,13-triene                                 | 0.77         |
| Retene                                                                     | 1.93         |
| <b>Hydrocarbons</b>                                                        | <b>0.00</b>  |
| <b>Alcohols</b>                                                            | <b>1.01</b>  |
| 1-Naphthalenol, 1,2,3,4-tetrahydro-2,5,8-trimethyl-                        | 1.01         |

**Table S14.** All metal contents of NiMoW catalysts supported on different materials

| (wt.%) | NiMoW/AC | NiMoW/SC | NiMoW/MWNTs |
|--------|----------|----------|-------------|
| Al     | 0.0430   | 0.0042   | 0.0175      |
| As     | 0.0013   | 0.0009   | 0.0016      |
| B      | 0.0011   | 0.0006   | 0.0005      |
| Ba     | 0.0033   | 0.0017   | 0.0003      |
| Be     | < MDL    | < MDL    | < MDL       |
| Ca     | 0.4179   | 0.1656   | 0.0333      |
| Cd     | < MDL    | < MDL    | < MDL       |
| Co     | 0.0098   | 0.0056   | 0.2039      |
| Cr     | 0.0008   | 0.0011   | 0.0010      |
| Cu     | 0.0011   | 0.0008   | 0.0003      |
| Fe     | 0.0300   | 0.0210   | 0.0109      |

|    |        |        |        |
|----|--------|--------|--------|
| K  | 0.0470 | 0.0819 | 0.0032 |
| Mg | 0.0916 | 0.0262 | 0.0085 |
| Mn | 0.0258 | 0.0167 | 0.0004 |
| Mo | 2.4000 | 1.9888 | 2.8213 |
| Na | 0.0760 | 0.0538 | 0.0485 |
| Ni | 5.1913 | 3.9913 | 5.1538 |
| P  | 0.0130 | 0.0062 | 0.0014 |
| Pb | < MDL  | < MDL  | < MDL  |
| S  | 0.3765 | 0.0122 | 0.0274 |
| Sb | < MDL  | < MDL  | < MDL  |
| Se | < MDL  | < MDL  | < MDL  |
| Si | 0.0337 | 0.0059 | 0.0034 |
| Sn | < MDL  | < MDL  | < MDL  |
| Sr | 0.0025 | 0.0008 | 0.0003 |
| Ti | < MDL  | < MDL  | < MDL  |
| Tl | < MDL  | < MDL  | < MDL  |
| V  | < MDL  | < MDL  | < MDL  |
| Zn | 0.0018 | 0.0042 | 0.0030 |

---

< MDL: lower than method detection limit
